# Supplementary material for: Stage‐specific regulation of Gremlin1 on the differentiation and expansion of human urinary induced pluripotent stem cells into endothelial progenitors
Source: PubMed Central journal article supplement (PMC7348142; doi:10.1111/jcmm.15433), 2020-05-28
Supplement: JCMM-24-8018-s001.pdf [file JCMM-24-8018-s001.pdf]

## A hUiPSCs→hUiPSC-EPs

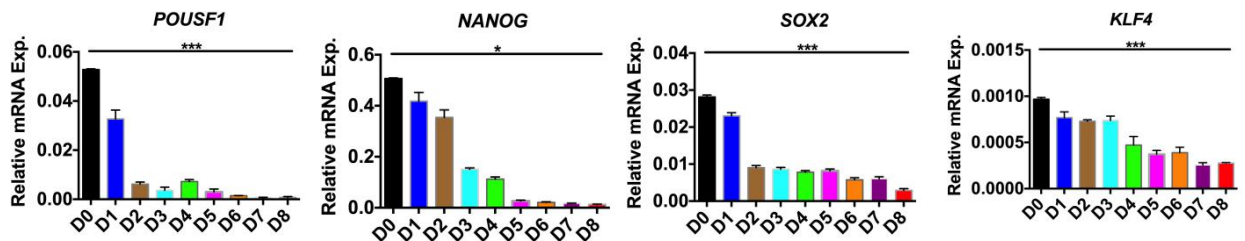

## B

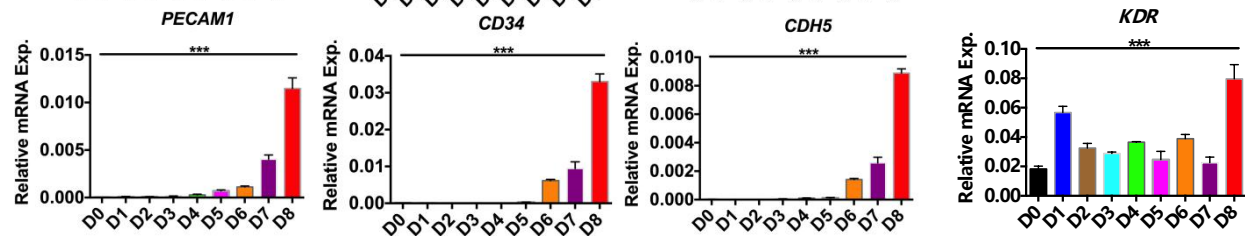

## C hESCs→hESC-EPs

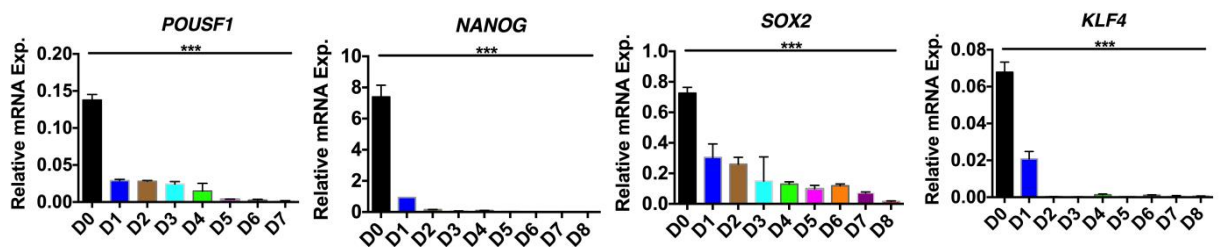

## D

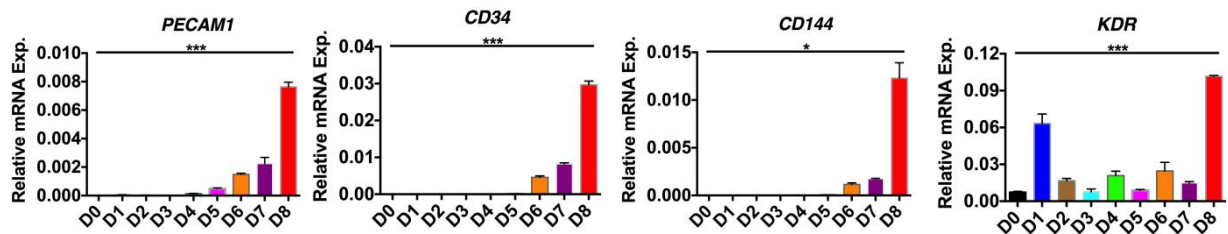

**Fig. S1. HPSC-related genes and endothelial progenitor-related genes expression during hUiPSC-EPs or hESC-EPs differentiation.**

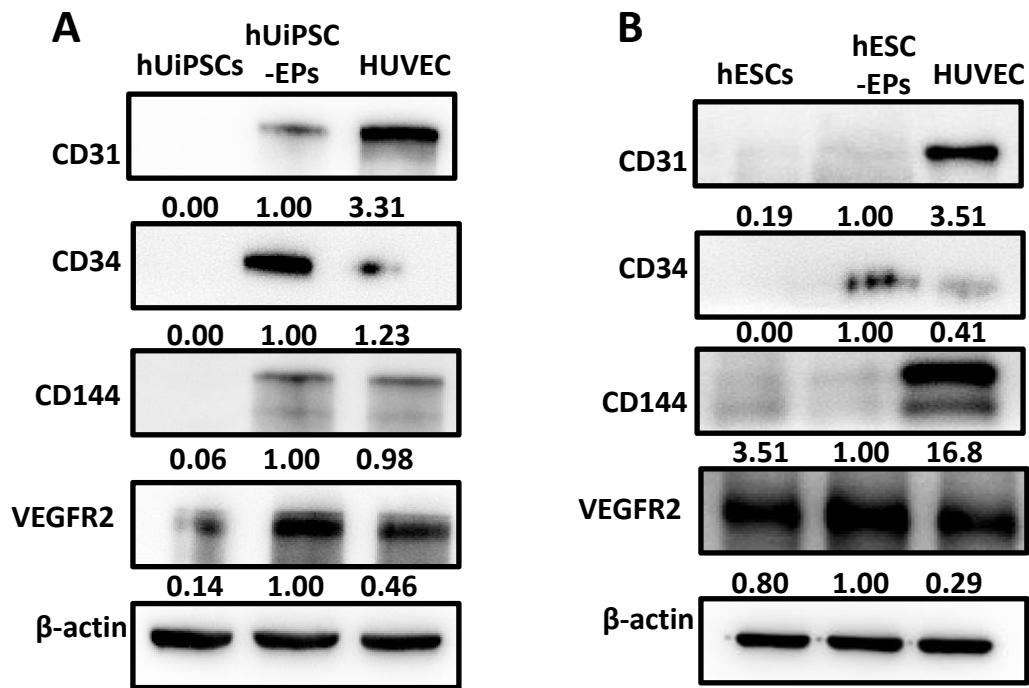

**Fig. S2. Endothelial progenitor-related protein expression during hUiPSC-EPs or hESC-EPs differentiation.**

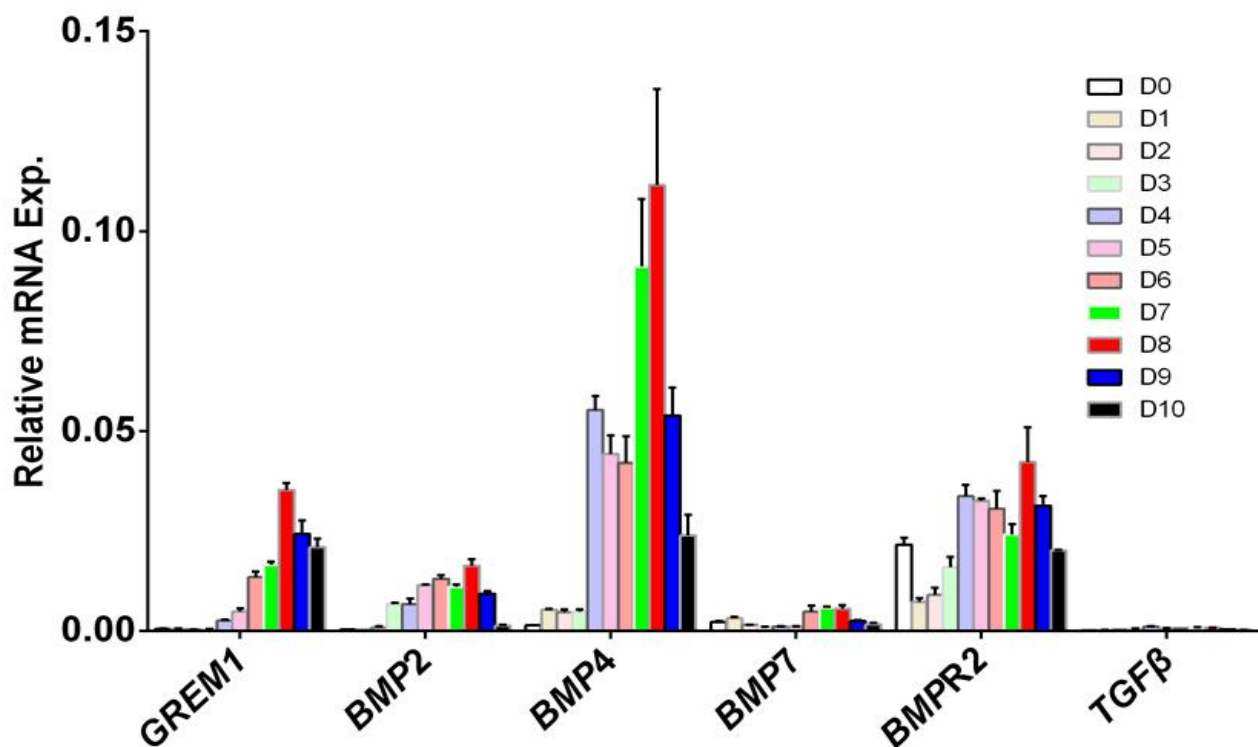

**Fig. S3. GREM1 and related genes expression during hUiPSC-EPs differentiation.**

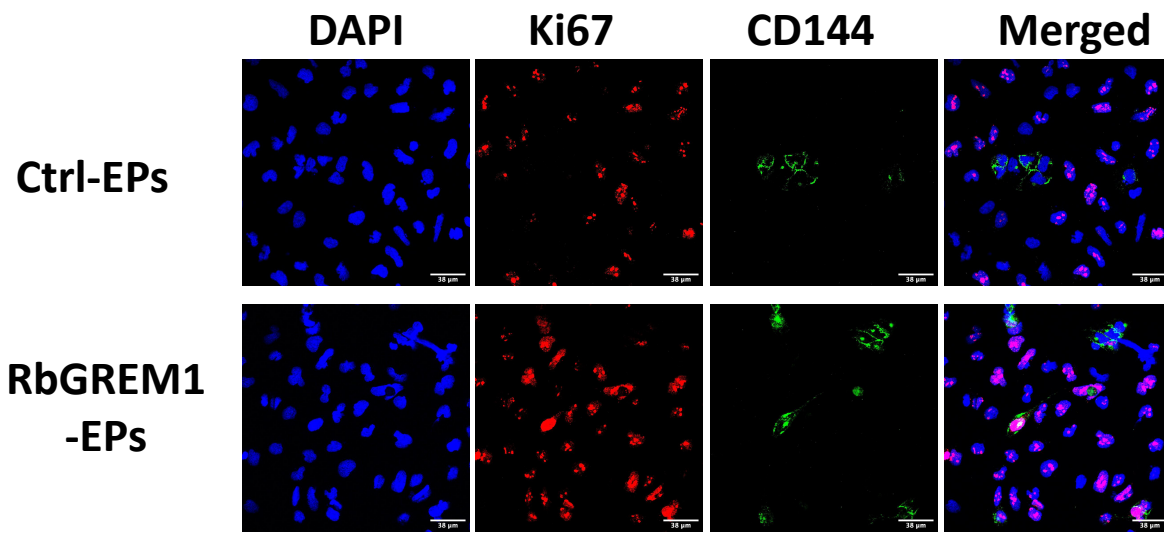

**Fig. S4. Recombinant protein GREM1 during Stage 3 could promote proliferation in both endothelial and non-endothelial cells.**

**A**

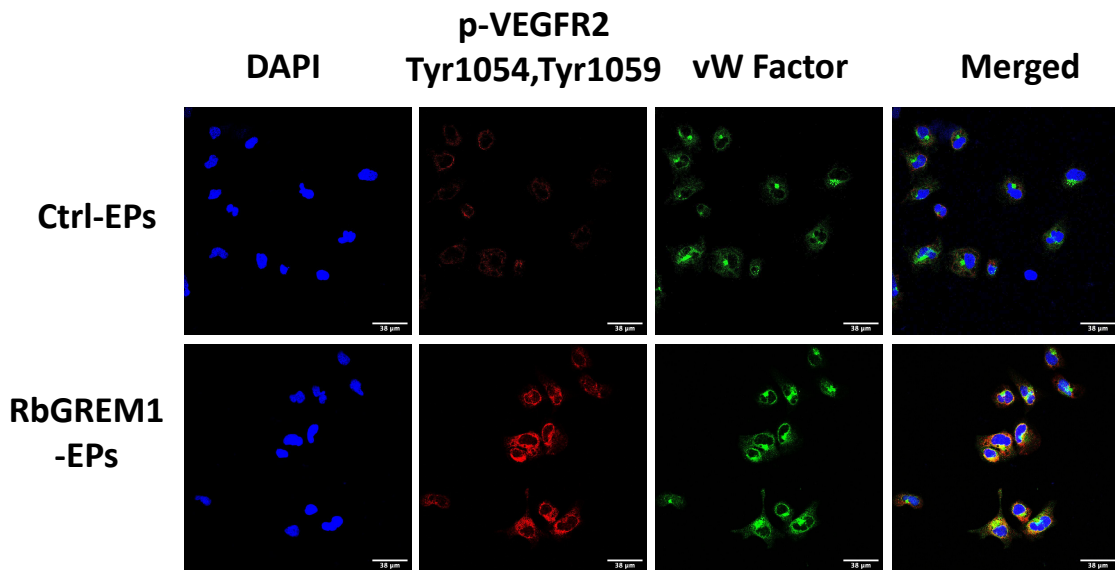

**B**

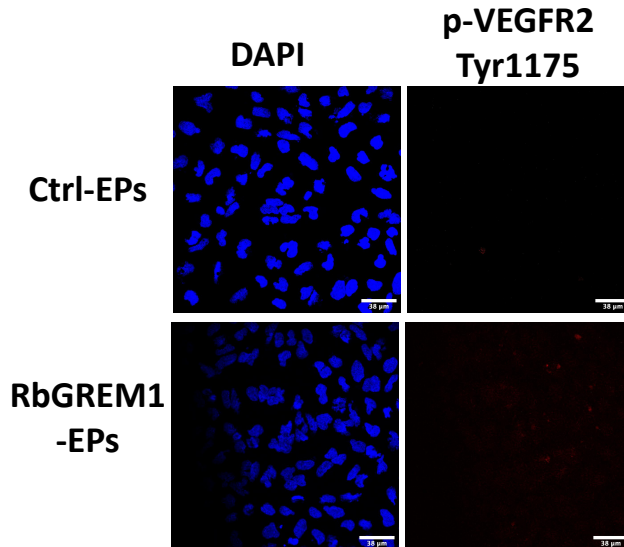

**Fig. S5. Recombinant protein GREM1 during Stage 3 could induce phosphorylation of VEGFR2 in endothelial cells.**

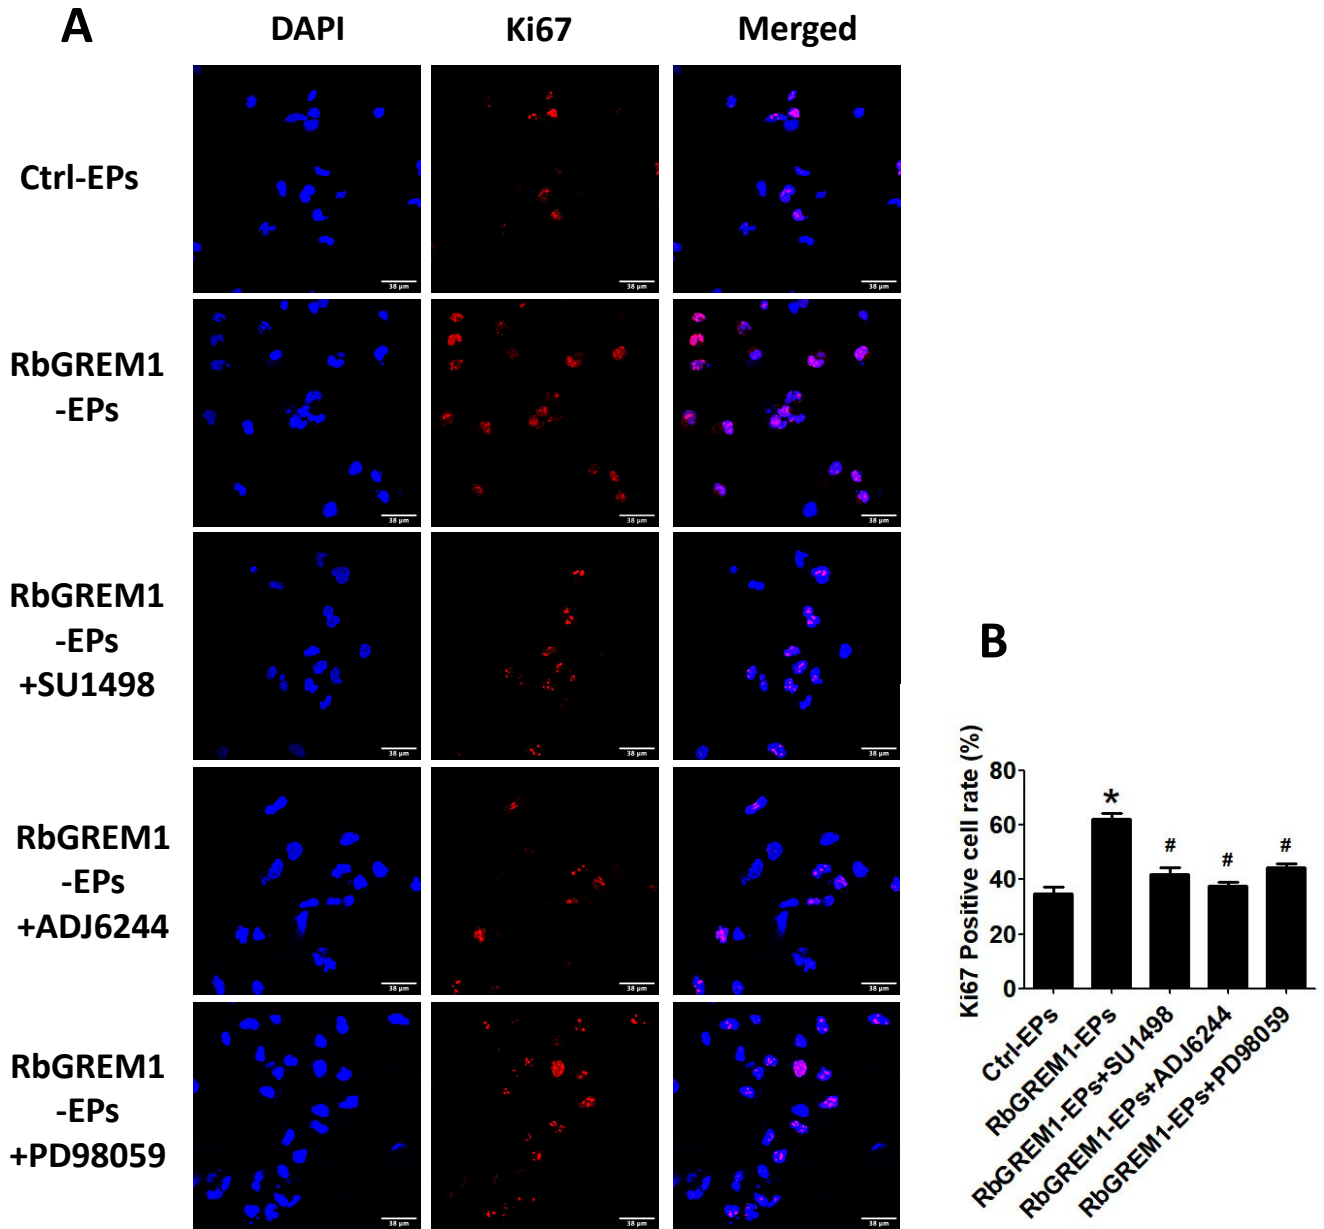

**Fig. S6. The VEGFR2/Akt and VEGFR2/p42/44MAPK signal pathways mediated the effect of recombinant protein GREM1 during Stage 3.**
