# Supplementary material for: Stage‐specific regulation of Gremlin1 on the differentiation and expansion of human urinary induced pluripotent stem cells into endothelial progenitors
Source: PubMed Central journal article supplement (PMC7348142; doi:10.1111/jcmm.15433), 2020-05-28
Supplement: JCMM-24-8018-s002.pdf [file JCMM-24-8018-s002.pdf]

**Supplementary Table 1. Antibodies used in FACS**

| <b>Antibodies</b> | <b>Host</b> | <b>Dilution</b> | <b>Cat. No.</b> | <b>Supplier</b> |
|-------------------|-------------|-----------------|-----------------|-----------------|
| CD31              | mouse       | 1:20            | #1934035        | Invitrogen      |
| CD34              | mouse       | 1:20            | #343604         | Biolegend       |
| CD144             | mouse       | 1:20            | #348508         | Biolegend       |
| VEGFR2            | mouse       | 1:5             | #580494         | BD Pharmingen™  |

**Supplementary Table 2. Primers for qPCR**

| <b>Gene</b> |         | <b>primers</b>          |
|-------------|---------|-------------------------|
| GREM1       | Forward | TTAAGCAGACCATCCACGA     |
|             | Reverse | TGTAGTTCAGGGCAGTTGAGT   |
| PECAM1      | Forward | CCAAGGTGGGATCGTGAGG     |
|             | Reverse | TCGGAAGGATAAACGCGGTC    |
| CD34        | Forward | TTTGCTTGCTGAGTTTGCTG    |
|             | Reverse | ATTTGAAAATGTTCCCTGGGT   |
| CDH5        | Forward | CATCTTCCCAGGAGGAACAG    |
|             | Reverse | AGAGCTCCACTCACGCTCAG    |
| KDR         | Forward | CCTGTATGGAGGAGGAGGAA    |
|             | Reverse | CGGCTCTTTCGCTTACTGTT    |
| BMP2        | Forward | CACTGTGCGCAGCTTCC       |
|             | Reverse | CCTCCGTGGGGATAGAACTT    |
| BMP4        | Forward | GCATTCGGTTACCAGGAATC    |
|             | Reverse | TGAGCCTTTCAGCAAGTTT     |
| BMP7        | Forward | TCGGCACCCATGTTTCATGC    |
|             | Reverse | GAGGAAATGGCTATCTTGCAGG  |
| BMPR2       | Forward | CGGCTGCTTCGCAGAATCA     |
|             | Reverse | TCTTGGGGATCTCCAATGTGAG  |
| POU5F1      | Forward | CTGGGTTGATCCTCGGACCT    |
|             | Reverse | CCATCGGAGTTGCTCTCCA     |
| NANOG       | Forward | TTTGTGGGCCTGAAGAAAAC    |
|             | Reverse | AGGGCTGTCCTGAATAAGCAG   |
| SOX2        | Forward | GCCGAGTGGAACTTTTGTGCG   |
|             | Reverse | GGCAGCGTGTACTTATCCTTCT  |
| KLF4        | Forward | CCCACATGAAGCGACTTCCC    |
|             | Reverse | CAGGTCCAGGAGATCGTTGAA   |
| GAPDH       | Forward | GGAGCGAGATCCCTCCAAAAT   |
|             | Reverse | GGCTGTTGTCATACTTCTCATGG |

**Supplementary Table 3. Primary antibodies**

| <b>Primary antibodies</b>     | <b>Host</b> | <b>Dilution</b> | <b>Cat. No.</b> | <b>Supplier</b>           |
|-------------------------------|-------------|-----------------|-----------------|---------------------------|
| GREMLIN1                      | rabbit      | 1:1000          | #4383           | Cell Signaling Technology |
| CD31                          | mouse       | 1:1000          | #3528           | Cell Signaling Technology |
| CD34                          | rabbit      | 1:1000          | #81289          | Abcam                     |
| CD144                         | goat        | 1:500           | #6458           | Santa Cruz                |
| VEGFR2                        | rabbit      | 1:1000          | #9698           | Cell Signaling Technology |
| BMP4                          | rabbit      | 1:1000          | #124715         | Abcam                     |
| p-VEGFR2 (Tyr1212)            | rabbit      | 1:1000          | #2477           | Cell Signaling Technology |
| AKT                           | rabbit      | 1:1000          | #9272           | Cell Signaling Technology |
| p-AKT                         | rabbit      | 1:1000          | #2965           | Cell Signaling Technology |
| P44/42 MAPK                   | rabbit      | 1:1000          | #4695           | Cell Signaling Technology |
| p- P44/42 MAPK                | rabbit      | 1:1000          | #4370           | Cell Signaling Technology |
| SMAD2/3                       | rabbit      | 1:1000          | #8685           | Cell Signaling Technology |
| p-SMAD2/3                     | rabbit      | 1:1000          | #8828           | Cell Signaling Technology |
| TGF $\beta$                   | rabbit      | 1:1000          | #3709           | Cell Signaling Technology |
| Ki67                          | rabbit      | 1:1000          | #9129           | Cell Signaling Technology |
| $\beta$ -actin                | rabbit      | 1:1000          | #4970           | Cell Signaling Technology |
| p-VEGFR2(Tyr1175)             | rabbit      | 1:1000          | #2478           | Cell Signaling Technology |
| p-VEGFR2(Tyr1054,<br>Tyr1059) | rabbit      | 1:1000          | #44-1047-G      | Thermofisher              |
| vW Factor                     | mouse       | 1:1000          | #sc53466        | Santacruz                 |
